# Supplementary material for: TGFβ pathway deregulation and abnormal phospho‐SMAD2/3 staining in hereditary cerebral hemorrhage with amyloidosis‐Dutch type
Source: PubMed Central journal article supplement (PMC8028662; doi:10.1111/bpa.12533), 2017-06-12
Supplement: BPA-28-495-s001.pdf [file BPA-28-495-s001.pdf]

## Supplementary tables

**Article title:** TGF $\beta$  pathway deregulation and abnormal phospho-SMAD2/3 staining in hereditary cerebral hemorrhage with amyloidosis-Dutch type

**Journal:** Brain Pathology (2017)

**Authors and affiliations:** Laure Grand Moursel<sup>\*1,2</sup>, Leon P. Munting<sup>1,2</sup>, Linda M. van der Graaf<sup>1,2</sup>, Sjoerd G. van Duinen<sup>3</sup>, Marie-Jose T.H. Goumans<sup>4</sup>, Uwe Ueberham<sup>5</sup>, Remco Natté<sup>3</sup>, Mark A. van Buchem<sup>2</sup>, Willeke M.C. van Roon-Mom<sup>1</sup>, Louise van der Weerd<sup>1,2</sup>

<sup>1</sup>Department of Human Genetics, Leiden University Medical Center

<sup>2</sup>Department of Radiology, Leiden University Medical Center

<sup>3</sup>Department of Pathology, Leiden University Medical Center

<sup>4</sup>Department of Molecular Cell Biology, Leiden University Medical Center

<sup>5</sup>Paul Flechsig Institute of Brain Research, University of Leipzig

**\*Corresponding author**

Leiden University Medical Center, Einthovenweg 20, 2333 ZC Leiden, The Netherlands

Phone: +31-71-526 9603 E-mail: [L.Grand\\_Moursel@lumc.nl](mailto:L.Grand_Moursel@lumc.nl)

**Supplementary Table 1** list of antibodies used in this study

| Reference               | Name or clone    | Antigen /Epitopes recognized                       | Host    | Dilution IHC         | Company & Type |
|-------------------------|------------------|----------------------------------------------------|---------|----------------------|----------------|
| 3101S <sup>a</sup>      | pSMAD2/3         | Phospho-SMAD2 (Ser465/467)/SMAD3 (Ser423/425)      | Rb (pc) | 1:500 or 1:1000 +TSA | Cell Signaling |
| 3108 <sup>a</sup>       | pSMAD2/3         | Phospho-SMAD2 (Ser465/467)/SMAD3 (Ser423/425)      | Rb (mc) | 1:100                | Cell Signaling |
| sc-11769-R <sup>a</sup> | pSMAD2/3         | Phospho-SMAD2 (Ser465/467)/SMAD3 (Ser423/425)      | Rb (pc) | 1:500 or 1:1000 +TSA | Santa Cruz     |
| 9515                    | SMAD4            | SMAD4                                              | Rb (pc) | 1:100                | Cell Signaling |
| A1474                   | 6E10             | A $\beta$ protein [1-17]                           | Ms (mc) | 1:1000               | Sigma          |
| A1349                   | 4G8 <sup>b</sup> | A $\beta$ protein [17-24]                          | Ms (mc) | 1:1000               | Sigma          |
| G3893                   | GA5              | Glial Fibrillary Acidic Protein (GFAP)             | Ms (mc) | 1:5000               | Sigma          |
| MAB364                  | HM-2             | Microtubule-associated protein 2 (MAP-2)           | Ms (mc) | 1:2000               | Chemicon       |
| BR-003                  | AT-8             | Human PHF-tau, phosphorylated at Ser202 and Thr205 | Ms (mc) | 1:2000               | Innogenetics   |
| mab1510                 | Ubi-1            | Ubiquitin                                          | Ms (mc) | 1:3000               | Millipore      |
| ab6586                  | Collagen IV      | Collagen IV native protein                         | Rb (pc) | 1:200 <sup>c</sup>   | Abcam          |
| ab11575                 | Laminin          | Laminin native protein                             | Rb (pc) | 1:100 <sup>d</sup>   | Abcam          |
| M0851                   | SMA ( IA4)       | Smooth muscle actin                                | Ms (mc) | 1:2000               | Dako           |

Rb Rabbit, Ms Mouse, pc polyclonal, mc monoclonal

<sup>a</sup> the present study was conducted with #3101S antibody; sc-11769-R recognizing the same epitope gave exact identical pattern (Supplementary Figure 1C). #3108, a monoclonal version of #3101S, also stained the pSMAD2/3 granules although the signal was weaker (Supplementary Figure 1D).

<sup>b</sup> data not shown, identical to 6E10 staining

<sup>c</sup> no antigen retrieval

<sup>d</sup> proteinase K antigen retrieval

**Supplementary Table 2** Occurrence of pSMAD2/3 deposits in occipital cortex of HCHWA-D subjects and clinical details

| Code | Age | Gender | pSMAD2/3 angiopathic vessels <sup>a</sup> | Perivascular pSMAD2/3 granules <sup>b</sup> | Delay last ICH to death | Interval 1st stroke-death | Previous stroke   | Cause of death |
|------|-----|--------|-------------------------------------------|---------------------------------------------|-------------------------|---------------------------|-------------------|----------------|
| H7   | 71  | M      | 77 % *                                    | +/-                                         | No major bleeding       | 26 y                      | No major bleeding | hematemesis    |
| H6   | 61  | M      | 70 % *                                    | +/-                                         | 8 y                     | 15 y                      | 5                 | pneumonia      |
| H4   | 55  | F      | 72 %                                      | +                                           | 3 d (operated)          | 3 d                       | 0                 | ICH            |
| H5   | 50  | M      | 46 %                                      | +                                           | n.a.                    | 6 y                       | 2                 | ICH            |
| H1   | 48  | M      | 36 %                                      | ++                                          | 4 d                     | 3 y                       | 1                 | ICH            |
| H2   | 57  | M      | 3 %                                       | -                                           | 17 d (remission)        | 9 y                       | 2                 | pneumonia      |
| H3   | 53  | F      | 0 %                                       | +/-                                         | 1 d                     | 1 d                       | 0                 | ICH            |
| H8   | 51  | M      | 43 %                                      | +++                                         | 3 d                     | 4 y                       | 1                 | ICH            |
| H11  | 81  | F      | 39 %                                      | - #                                         | No major bleeding       | 23 y                      | No major bleeding | pneumonia      |
| H9   | 67  | F      | 84 % *                                    | - #                                         | unknown                 | 21 y                      | 3 (1 ischemic)    | suffocation    |
| H10  | 71  | M      | 63 %                                      | - #                                         | 1 d                     | 17 y                      | 3                 | ICH            |

ICH intracerebral hemorrhage, y years, d day(s), n.a. not available

<sup>a</sup> percentage from average grading occipital cortex, \* capCAA involved

<sup>b</sup> ranked based on single slide observation (+/- : scarcely found, + to +++ : occurrence of finding),  
<sup>#</sup> DAB procedure only (although visible with DAB staining; the presence of perivascular granules is more easily assessed in immunofluorescence and preferably with TSA enhancement)
